# Supplementary material for: The Drosophila caspase Ice is important for many apoptotic cell deaths and for spermatid individualization, a nonapoptotic process
Source: Oxford University Press journal article supplement (doi:10.1242/dev.02495), 2006-08-03
Supplement: dev02495tables1.pdf [file dev02495tables1.pdf]

**Table S1. Summary of abnormal masses**

| Genotype                    | Head | Wing and leg discs |
|-----------------------------|------|--------------------|
| <i>Ice</i> <sup>Δ1</sup> /+ | 0.16 | 0.05               |
| <i>Ice</i> <sup>Δ1</sup>    | 3.64 | 3.80               |
| <i>Ice</i> <sup>Δ1</sup> /+ | 0.77 | 0.09               |
| <i>Ice</i> <sup>Δ1</sup>    | 6.31 | 5.00               |

Summary of defects associated with loss of *Ice* in 24-hour pupae. See text and methods for details. The numbers refer to the number of masses observed per section. On average, eight sections were scored per pupa. Thus, wild-type animals contain on average about one mass, while animals lacking zygotic *Ice* contain on average about 30.
